# Supplementary material for: Synthesis and structure of a nitrogen/sulfur-ligated zinc hydroxide complex
Source: Royal Society of Chemistry journal article supplement (doi:10.1039/b003144p), 2000-01-01
Supplement: b003144p.doc [file b003144p.doc]

# Revised Supplementary Information

Synthesis and structure of a nitrogen/sulfur-ligated zinc hydroxide complex

Lisa M. Berreau,†,* Russell A. Allred,† Magdalena M. Makowska-Grzyska,†

and Atta M. Arif‡

†Department of Chemistry and Biochemistry, Utah State University, 0300 Old Main Hill, Logan, UT 84322-0300.

‡Department of Chemistry, University of Utah, 315 S. 1400 E., Salt Lake City, Utah 84112

*Corresponding author. FAX: (435) 797-3390; email: [berreau@cc.usu.edu](mailto:berreau@cc.usu.edu)

**Experimental Procedures.**

**Synthesis and Characterization of Ligands and Complexes.**

**Safety note.** *Caution!* Perchlorate salts of metal complexes with organic ligands are potentially explosive. Only a small amount of material should be prepared and these should be handled with great care.

***N*-bis-2-(methylthio)ethyl-*N*-(6-pivalolyamido-2-pyridylmethyl)amine (bmppa)** To a solution of 2-pivalolylamide-6-aminomethylpyridine(1.11 g, 5.36 mmol) in CH3CN (80 mL) were added 1-bromo-2-methylthioethane (1.66 mg, 10.73 mmol), sodium carbonate (5.35 g), and tetrabutylammonium bromide (~3 mg). The resulting mixture was heated at reflux for 12 h. After cooling to room temperature, the reaction mixture was poured into 1 M NaOH (~50 mL). The resulting solution was extracted with CH2Cl2 (3 x 80 mL), the combined organic fractions were dried over Na2SO4, and the solution was brought to dryness under reduced pressure. Column chromatography on silica gel (3:1 ethyl acetate:hexane, Rf  0.88; impurity observed at Rf ~ 0.10) yielded a pale yellow oil (1.16 g, 61%). 1H NMR (CD3OD, 270 MHz)  7.97 (d, *J =* 8.2 Hz, 1H), 7.76 (t, *J =* 8.2 Hz, 1H), 7.30 (d, *J =* 8.2 Hz, 1H), 3.74 (s, 2H), 2.82-2.73 (m, 4H), 2.66-2.58 (m, 4H), 2.05 (s, 6H), 1.31 (s, 9H); 1H NMR (CD3CN, 270 MHz)  8.17 (br, 1H, N-H), 7.98 (d, *J =* 8.2 Hz, 1H), 7.68 (t, *J =* 8.2 Hz, 1H), 7.24 (d, *J =* 8.2 Hz, 1H), 3.68 (s, 2H), 2.84-2.52 (m, 8H), 2.05 (s, 6H), 1.26 (s, 9H); 13C{1H} NMR (CD3OD, 67.9 MHz)  178.2, 158.2, 151.1, 138.7, 119.2, 112.5, 59.4, 53.6, 39.5, 31.2, 26.3, 14.0 (12 signals expected and observed); FTIR (CH3CN, ~100 mM, cm-1) 1687 (amide I), 1578 (amide II); LRFAB-MS (CH2Cl2:NBA), *m/z* (relative intensity): 356 ([M+H]+, 100%); HRFAB-MS, *m/z* : calcd. for C17H30N3OS2, 356.1830; found, 356.1830.

***N*-bis-2-(methylthio)ethyl-*N*-(6-neopentylamino-2-pyridylmethyl)amine (bmnpa).** To a 500 mL round bottom flask was added 0.57 g (15 mmol) LiAlH4 followed by a solution of 30 mL dry pyridine in 120 mL dry THF. To this solution was added 1.6 g (4.5 mmol) of LAm(SMe)2 dissolved in 40 mL of THF. The resulting solution was heated at reflux with stirring under a N2 atmosphere for 30 hours. After cooling the reaction mixture to ambient temperature, an equal volume of water was added, with the initial addition being done dropwise to minimize vigorous bubbling and emulsion formation. Extraction of the mixed organic/aqueous reaction mixture with EtOAc (3 x 180 mL), followed by drying of the combined organic fractions with Na2SO4, filtration, and removal of the solvent under reduced pressure yielded a thick orange-yellow oil. The analytically pure ligand (bmnpa) was isolated following column chromatography (ethyl acetate, 200-400 mesh silica gel, Rf ~ 0.9) as a clear pale orange oil (83% yield). 1H NMR (CD3CN, 270 MHz): 7.32 (t, *J* = 7.2 Hz, 1H), 6.60 (d, *J* = 7.2 Hz, 1H), 6.32 (d, *J* = 8.2 Hz, 1H), 5.01 (t, *J* = 6.3 Hz, 1H), 3.56 (s, 2H), 3.12 (d, *J* = 6.3 Hz), 2.78-2.70 (m, 4H), 2.63-2.55 (m, 4H), 2.04 (s, 6H), 0.93 (s, 9H) ppm; 13C{1H} NMR (CDCl3, 67.9 MHz): 159.0, 157.7, 137.9, 111.5, 103.8, 60.1, 54.0, 53.8, 32.1, 31.9, 27.6, 15.8 ppm (12 resonances expected and observed); HRFAB-MS, *m/z*: calcd. for [C17H31N3S2+H]+, 342.2038; found, 342.2025. Anal Calcd. for C17H31N3S2: C, 59.79; H, 9.16; N, 12.31. Found: C, 59.39; H, 9.07; N, 12.22.

**[(bmnpa)Zn(OH)]ClO4 (1).** To a methanol solution (2.5 mL) of bmnpa (120 mg, 0.351 mmol) was added a methanol solution (1.5 mL) of Zn(ClO4)26H2O (131 mg, 0.351 mmol). The resulting solution was stirred for ~10 min at ambient temperature, at which time a methanol solution (2 mL) of KOH (20 mg, 0.351 mmol) was added. Following 30 min of rapid stirring, an excess of deithyl ether (~15 mL) was added and the resulting cloudy mixture was cooled to ~-18 C for 12 h. A white solid that had deposited was then collected and carefully dried under vacuum. The solid was then slurried in MeOH, the organic fraction removed by careful pipetting, and the remaining solid dried under vacuum. This solid was then redissolved in CH3CN, filtered through glass wool, and the filtrate was brought to dryness under reduced pressure, yielding a white powder. Recrystallization of this powder by diethyl ether diffusion into a CH3CN solution at ambient temperature yielded crystalline blocks suitable for X-ray diffraction (168 mg, 92%). 1H NMR (CD3CN, 270 MHz): 8.97 (t, *J* = 6.3 Hz, 1H), 7.58 (t, *J* = 7.9 Hz, 1H), 6.65 (d, *J* = 8.9 Hz, 1H), 6.52 (d, *J* = 7.3 Hz, 1H), 3.94 (s, 2H), 3.08-2.98 (m, 2H), 2.92-2.74 (m, 4H), 2.73-2.62 (m, 4H), 2.14 (s, 6H), 0.85 (s, 9H) ppm; 13C{1H} NMR (CD3CN, 67.9 MHz):  160.5, 151.3, 141.4, 110.8, 106.8, 58.5, 53.1, 49.5, 32.9, 29.2, 26.6, 15.0; FTIR (KBr, cm-1) 3522 (O-H), 3240 (br, N-H). Anal Calcd. for C17H32N3O5ClS2Zn: C, 39.15; H, 6.19; N, 8.06. Found: C, 39.34; H, 6.21; N, 8.12.

**[(bmnpa)Zn(ClO4)]ClO4 (2).** To a methanol solution (1 mL) of bmnpa (26 mg, 0.077 mmol) was added a methanol solution (1 mL) of Zn(ClO4)26H2O (29 mg, 0.077 mmol). The resulting clear, colorless solution was stirred at ambient temperature for 15 min. The methanol solvent was then removed under reduced pressure. The remaining oily material was redissolved in CH3CN and was again pumped to dryness, yielding an analytically pure white solid (43 mg, 92%). Crystals suitable for X-ray diffraction analysis were grown from slow diffusion of Et2O into a CH3CN solution of **2** at ambient temperature. 1H NMR (CD3CN, 270 MHz): 7.70 (t, *J* = 7.7 Hz, 1H), 6.84 (d, *J* = 8.9 Hz, 1H), 6.67 (d, *J* = 6.9 Hz, 1H), 5.80 (t, *J* = 6.6 Hz, 1H), 4.01 (s, 2H), 3.16 (d, *J* = 6.6 Hz), 3.08-2.70 (m, 8H), 2.21 (s, 6H), 1.00 (s, 9H) ppm; 13C{1H} NMR (CD3CN, 67.9 MHz):  159.1, 151.0, 141.9, 112.3, 107.8, 58.9, 54.0, 50.7, 32.5, 31.6, 26.7, 14.9; FTIR (KBr, cm-1) 3390 (br, N-H); LRFAB-MS (MeOH:NBA), *m/z* (relative intensity): 504 ([M-ClO4]+, 100%). Anal Calcd. for C17H31N3O8Cl2S2Zn: C, 33.83; H, 5.18; N, 6.97. Found: C, 33.66; H, 5.26; N, 6.98.
